# Supplementary material
Source: PubMed Central journal article supplement (PMC9613609)
Supplement: NIHMS1835539-supplement-Supplementary_Material.pdf [file NIHMS1835539-supplement-Supplementary_Material.pdf]

# Exposure to Industrial Hog and Poultry Operations and Urinary Tract Infections in North Carolina, USA: Supplementary Material

*David A. Holcomb, Arbor J.L. Quist, Lawrence S. Engel*

Department of Epidemiology, Gillings School of Global Public Health, University of North  
Carolina at Chapel Hill, Chapel Hill, NC, USA

This supplement contains 22 pages, 2 figures, and 6 tables.

## **Table of Contents**

|                                                      |           |
|------------------------------------------------------|-----------|
| <b>S1. Covariate Selection .....</b>                 | <b>3</b>  |
| <b>S2. Density Calculation Buffer Distance .....</b> | <b>4</b>  |
| <b>S3. Spatial Variance.....</b>                     | <b>9</b>  |
| <b>S4. Effect Estimates .....</b>                    | <b>11</b> |
| <b>S5. Stan Model Code.....</b>                      | <b>17</b> |
| <b>S6. Supplementary References .....</b>            | <b>20</b> |

## S1. Covariate Selection

We considered known urinary tract infection (UTI) risk factors and available Census variables to assemble a set of covariates for inclusion in this analysis (Foxman, 2010). We used directed acyclic graphs (DAG) to identify the potential confounders of the livestock density and UTI emergency department (ED) visit relationship (Fleischer and Roux, 2008; Tennant et al., 2020). The minimally sufficient adjustment set (Figure S1) was determined using the **R** package *daggity* to specify and evaluate the DAGs (Textor et al., 2017).

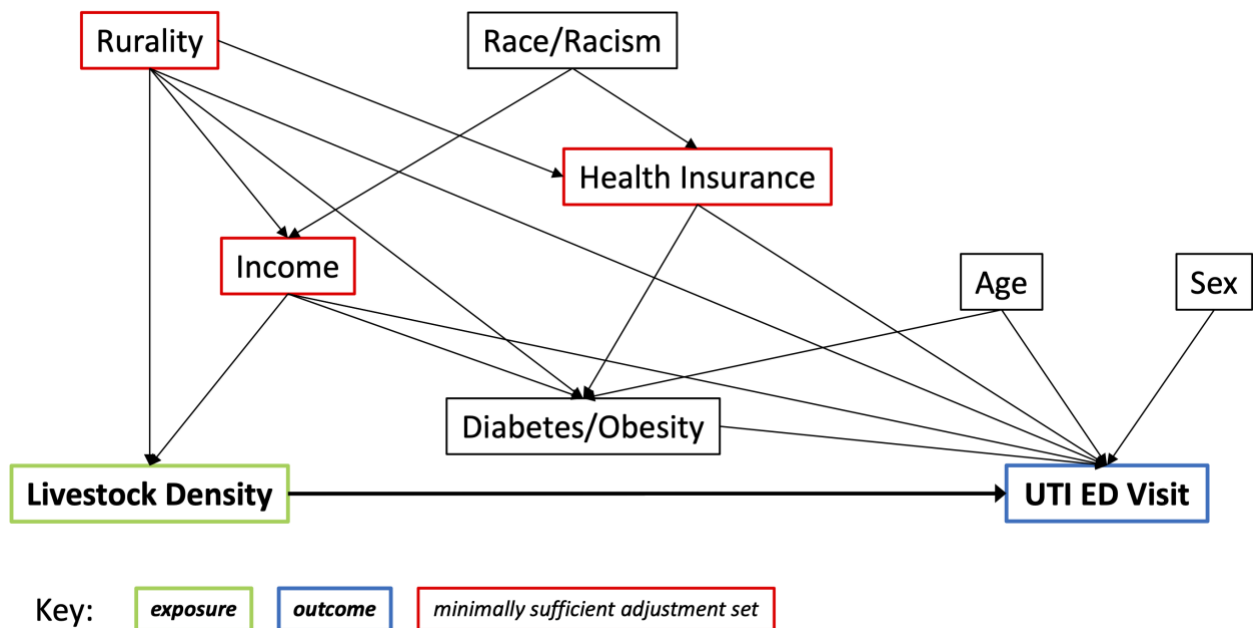

Figure S1. Directed acyclic graph.

## **S2. Density Calculation Buffer Distance**

Exposure variables were derived from counts of hogs and poultry housed in confined animal feeding operations (CAFOs), for which the point locations were known. However, the outcome and many other covariates of interest were available only in aggregate by ZIP codes (which correspond to postal delivery routes), requiring aggregation of the livestock counts over the same areal units in order to express exposures on the same spatial scale as the outcomes (Best et al., 2000; Briant et al., 2010; Parenteau and Sawada, 2011). The simplest aggregation approach, summing the animal counts for all CAFOs located in a given ZIP code and dividing by ZIP code area to obtain the animal spatial density for each ZIP code, carries the implicit assumption that the population is uniformly spatially distributed across the ZIP code and also ignores any contributions from CAFOs located near ZIP code residents but outside of the ZIP code boundaries. A buffer distance may be extended around the boundary of each ZIP code to incorporate nearby CAFO locations, but doing so increases the area over which uniform population distribution is assumed, potentially exacerbating exposure assessment error in the presence of population clustering within the ZIP code.

To partially address concerns about population clustering, we instead estimated animal exposures at a finer spatial resolution by aggregating animal counts within census blocks and assigning census blocks to ZIP codes on the basis of the block geographic centroid. We applied buffers to the block boundaries to capture nearby CAFOs, calculated spatial densities using the combined area of the block and its buffer region as the denominator, and used the block population to estimate a population-weighted mean density across all the blocks in the ZIP code. This approach produces a single animal exposure estimate per ZIP code that is weighted by the ZIP code population that may be exposed to CAFOs through residential proximity, including

CAFOs outside the ZIP code boundary but within the selected buffer distance of populated census blocks. Previous studies of CAFO-related pollution have considered proximity to CAFO locations ranging from approximately 0.5 km to 20 km (Casey et al., 2015; Christenson et al., 2022; de Rooij et al., 2019; Quist et al., 2022; Son et al., 2021a, 2021b; Wiesner-Friedman et al., 2022). We assessed the impact of buffer distance on the distribution of exposures and estimated associations with UTI incidence as a sensitivity analysis. Exposures were estimated using buffer distances of 0 (no buffer), 1, 3, 5, 10, and 15 km around census blocks and compared to the unweighted spatial density obtained using only CAFOs located within ZIP code boundaries. Buffer distances greater than 15 km resulted in substantial overlap between large numbers of blocks and CAFOs that required performing a computationally infeasible number of spatial intersection calculations.

Increasing the buffer distance increased the number of ZIP codes considered exposed (>0 density) and reduced the number of ZIP codes considered unexposed (Table S1). This was particularly notable with poultry, for which the 15 km buffer resulted in only 122 unexposed ZIP codes compared with 498 exposed ZIP codes. Increasing buffer distance also compressed the distribution of exposures, reducing the maximum estimated spatial density and the range of densities in each category of exposure. While the estimated UTI rate ratios generally increased with increasing buffer distance for hog exposures (Figure S2), the pattern for poultry exposure was far less consistent and the effects on model predictive performance were minimal for both animals (Table S2). We therefore selected a buffer distance of 5 km (~3 miles), which provided reasonable exposure distributions and aligns with many literature reports of elevated risks of various contaminants and health outcomes for residents within ~1 – 8 km of CAFOs, with risks

diminishing after ~5 – 8 km (Anker et al., 2018; Casey et al., 2013; Kravchenko et al., 2018; Quist et al., 2022; Williams et al., 2011).

Table S1. Exposure characteristics by buffer distance used to calculate livestock spatial density

| Exposure Category | Buffer      | Hog                              |            |              |              | Poultry                          |              |              |              |
|-------------------|-------------|----------------------------------|------------|--------------|--------------|----------------------------------|--------------|--------------|--------------|
|                   |             | Density (count/km <sup>2</sup> ) | ZIP codes  | UTI episodes | Person-years | Density (count/km <sup>2</sup> ) | ZIP codes    | UTI episodes | Person-years |
| unexposed         | unweighted  | 0                                | 423        | 338980       | 18352834     | 0                                | 268          | 155756       | 9203441      |
|                   | no buffer   | 0                                | 428        | 338919       | 18339512     | 0                                | 270          | 156880       | 9265701      |
|                   | 1km buffer  | 0                                | 391        | 309033       | 16827178     | 0                                | 241          | 123986       | 7711641      |
|                   | 3km buffer  | 0                                | 359        | 283077       | 15480500     | 0                                | 206          | 99020        | 6314277      |
|                   | 5km buffer  | 0                                | 324        | 253202       | 14016758     | 0                                | 184          | 85070        | 5375900      |
|                   | 10km buffer | 0                                | 282        | 214411       | 12040725     | 0                                | 152          | 67158        | 4215480      |
|                   | 15km buffer | 0                                | 248        | 188165       | 10283557     | 0                                | 122          | 42938        | 2745625      |
|                   | low         | unweighted                       | >0 - 21    | 66           | 69239        | 2911012                          | >0 - 2245    | 118          | 160453       |
| no buffer         |             | >0 - 8                           | 64         | 80263        | 3246316      | >0 - 1208                        | 117          | 174662       | 7978015      |
| 1km buffer        |             | >0 - 6                           | 77         | 94823        | 4190070      | >0 - 1093                        | 126          | 181419       | 8335648      |
| 3km buffer        |             | >0 - 4                           | 87         | 98029        | 4683170      | >0 - 922                         | 138          | 173300       | 8342258      |
| 5km buffer        |             | >0 - 4                           | 99         | 109814       | 5375323      | >0 - 887                         | 145          | 172628       | 8531930      |
| 10km buffer       |             | >0 - 5                           | 113        | 118259       | 5897359      | >0 - 1055                        | 156          | 152204       | 8117585      |
| 15km buffer       |             | >0 - 5                           | 124        | 121479       | 6646375      | >0 - 1001                        | 166          | 152207       | 8238083      |
| medium            |             | unweighted                       | 21 - 100   | 66           | 62034        | 2635169                          | 2245 - 6630  | 117          | 120724       |
|                   | no buffer   | 8 - 53                           | 64         | 64956        | 2735456      | 1208 - 5414                      | 117          | 129480       | 5788891      |
|                   | 1km buffer  | 6 - 46                           | 76         | 64711        | 2698387      | 1093 - 5078                      | 126          | 141339       | 6413814      |
|                   | 3km buffer  | 4 - 44                           | 87         | 76686        | 3142937      | 922 - 4722                       | 138          | 163845       | 7345921      |
|                   | 5km buffer  | 4 - 36                           | 99         | 89350        | 3648783      | 887 - 4833                       | 146          | 169125       | 7716740      |
|                   | 10km buffer | 5 - 32                           | 113        | 104180       | 4609025      | 1055 - 4721                      | 156          | 180238       | 8259216      |
|                   | 15km buffer | 5 - 32                           | 124        | 101904       | 4719901      | 1001 - 4591                      | 166          | 178570       | 8634591      |
|                   | high        | unweighted                       | 100 - 1931 | 65           | 57814        | 2157828                          | 6630 - 47011 | 118          | 91134        |
| no buffer         |             | 53 - 1392                        | 64         | 43929        | 1735559      | 5414 - 45384                     | 116          | 67045        | 3024236      |
| 1km buffer        |             | 46 - 1268                        | 76         | 59500        | 2341208      | 5078 - 47267                     | 126          | 81323        | 3595740      |
| 3km buffer        |             | 44 - 1140                        | 87         | 70275        | 2750236      | 4722 - 40611                     | 138          | 91902        | 4054387      |
| 5km buffer        |             | 36 - 1099                        | 98         | 75701        | 3015979      | 4833 - 39499                     | 145          | 101244       | 4432273      |
| 10km buffer       |             | 32 - 1155                        | 112        | 91217        | 3509734      | 4721 - 32130                     | 156          | 128467       | 5464562      |
| 15km buffer       |             | 32 - 1043                        | 124        | 116519       | 4407010      | 4591 - 29092                     | 166          | 154352       | 6438544      |

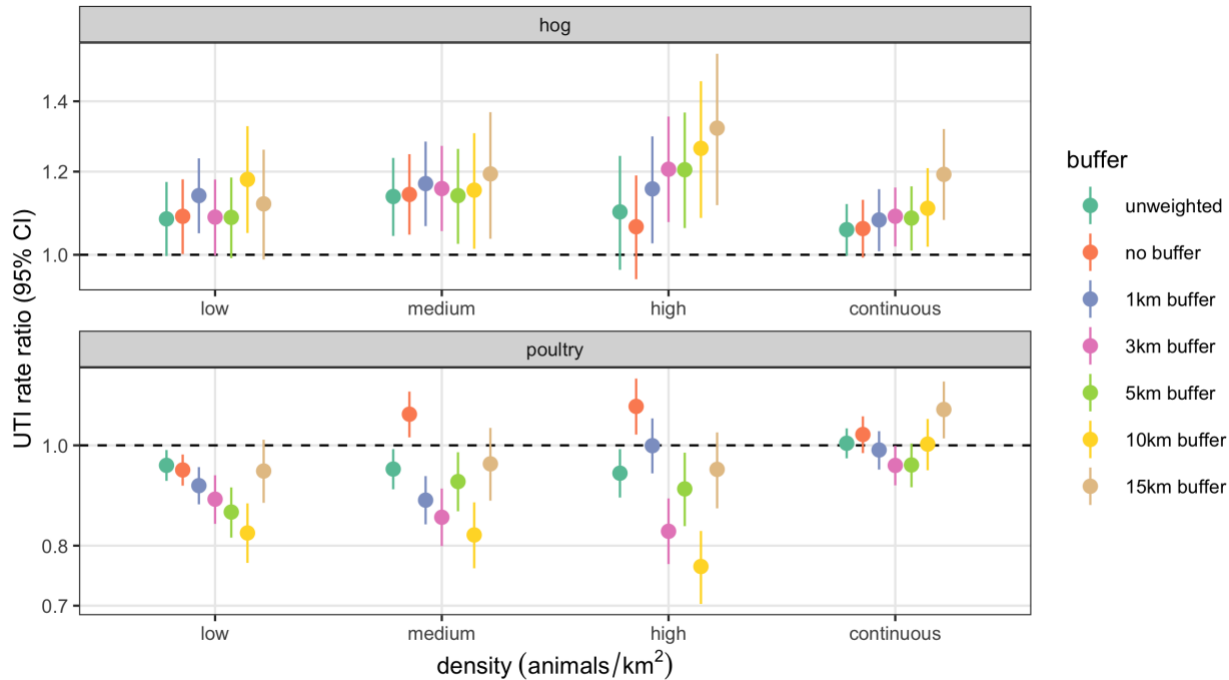

Figure S2. UTI rate ratio estimates for exposure to hogs and poultry buffer distance used to define livestock density exposure. Unweighted buffer distance indicates the ZIP code boundary alone was used to calculate livestock spatial density. All other distances refer to the buffer around each census block used to determine block-specific livestock spatial density, from which population-weighted mean ZIP code density was calculated using 2010 block population.

Table S2. In-sample prediction error by buffer distance used to define livestock spatial density. Unweighted buffer distance indicates the ZIP code boundary alone was used to calculate livestock spatial density. All other distances refer to the buffer around each census block used to determine block-specific livestock spatial density, from which population-weighted mean ZIP code density was calculated using 2010 block population.

| Buffer      | Median Prediction RMSE <sup>a</sup> (UTI episodes) |            |             |            |
|-------------|----------------------------------------------------|------------|-------------|------------|
|             | Hog                                                |            | Poultry     |            |
|             | Categorical                                        | Continuous | Categorical | Continuous |
| unweighted  | 31.95                                              | 31.94      | 31.9        | 31.96      |
| no buffer   | 31.94                                              | 31.96      | 31.57       | 31.94      |
| 1km buffer  | 31.96                                              | 31.95      | 31.4        | 31.95      |
| 3km buffer  | 31.95                                              | 31.94      | 31.78       | 31.94      |
| 5km buffer  | 31.95                                              | 31.96      | 31.75       | 31.91      |
| 10km buffer | 31.95                                              | 31.95      | 31.74       | 31.95      |
| 15km buffer | 31.94                                              | 31.95      | 31.95       | 31.96      |

<sup>a</sup> RMSE: root mean square error, calculated at the median of the posterior predictive distribution of UTI episodes for each observation.



### **S3. Spatial Variance**

A combined random effect, comprising both spatially structured and heterogenous (unstructured) components, was estimated for each ZIP code to account for overdispersion of UTI incidence rates. The magnitude of overdispersion was estimated as the overall variance of the combined random effects, which describes the extent to which rates vary between ZIP codes after accounting for the effect of the exposure and other covariates included in the model as fixed effects. Estimates of the residual variance and the proportion of the residual variance that was explained by spatial autocorrelation in rates between neighboring ZIP codes are presented in Table S3 for each model specification that we fit, including models assessing joint exposures and effect measure modification (EMM).

Table S3. Variance of the combined random effect and the spatial variance proportion estimates for all BYM2 models of UTI rate conducted for the main analysis

| <b>model</b>          | <b>exposure</b> | <b>animal</b> | <b>residual variance<br/>(95% CI)</b> | <b>spatial variance<br/>proportion <math>\rho</math><br/>(95% CI)</b> |
|-----------------------|-----------------|---------------|---------------------------------------|-----------------------------------------------------------------------|
| intercept only        | continuous      | null          | 1.37 (1.31, 1.43)                     | 0.96 (0.92, 0.99)                                                     |
| single exposure       | categorical     | hog           | 1.32 (1.27, 1.37)                     | 0.96 (0.92, 0.99)                                                     |
| single exposure       | categorical     | poultry       | 1.32 (1.28, 1.38)                     | 0.96 (0.92, 0.99)                                                     |
| single exposure       | continuous      | hog           | 1.32 (1.27, 1.37)                     | 0.96 (0.92, 0.99)                                                     |
| single exposure       | continuous      | poultry       | 1.33 (1.28, 1.38)                     | 0.96 (0.93, 0.99)                                                     |
| mutually adjusted     | categorical     | hog & poultry | 1.32 (1.27, 1.37)                     | 0.96 (0.92, 0.99)                                                     |
| mutually adjusted     | continuous      | hog & poultry | 1.32 (1.28, 1.38)                     | 0.96 (0.93, 0.99)                                                     |
| joint exposure        | categorical     | hog & poultry | 1.31 (1.26, 1.36)                     | 0.96 (0.92, 0.99)                                                     |
| joint exposure        | continuous      | hog & poultry | 1.34 (1.28, 1.39)                     | 0.96 (0.93, 0.99)                                                     |
| EMM by year           | categorical     | hog           | 1.35 (1.29, 1.41)                     | 0.96 (0.92, 0.99)                                                     |
| EMM by year           | categorical     | poultry       | 1.35 (1.30, 1.42)                     | 0.96 (0.92, 0.99)                                                     |
| EMM by year           | continuous      | hog           | 1.35 (1.29, 1.41)                     | 0.96 (0.92, 0.99)                                                     |
| EMM by year           | continuous      | poultry       | 1.35 (1.30, 1.42)                     | 0.96 (0.93, 0.99)                                                     |
| EMM by sex            | categorical     | hog           | 1.30 (1.25, 1.36)                     | 0.96 (0.91, 0.99)                                                     |
| EMM by sex            | categorical     | poultry       | 1.31 (1.26, 1.36)                     | 0.96 (0.92, 0.99)                                                     |
| EMM by sex            | continuous      | hog           | 1.30 (1.26, 1.36)                     | 0.96 (0.92, 0.99)                                                     |
| EMM by sex            | continuous      | poultry       | 1.31 (1.26, 1.37)                     | 0.96 (0.93, 0.99)                                                     |
| EMM by age            | categorical     | hog           | 1.30 (1.25, 1.36)                     | 0.96 (0.91, 0.99)                                                     |
| EMM by age            | categorical     | poultry       | 1.31 (1.26, 1.37)                     | 0.96 (0.92, 0.99)                                                     |
| EMM by age            | continuous      | hog           | 1.30 (1.26, 1.36)                     | 0.96 (0.92, 0.99)                                                     |
| EMM by age            | continuous      | poultry       | 1.32 (1.27, 1.37)                     | 0.96 (0.92, 0.99)                                                     |
| EMM by race/ethnicity | categorical     | hog           | 1.41 (1.35, 1.48)                     | 0.96 (0.92, 0.99)                                                     |
| EMM by race/ethnicity | categorical     | poultry       | 1.42 (1.35, 1.50)                     | 0.96 (0.92, 0.99)                                                     |
| EMM by race/ethnicity | continuous      | hog           | 1.41 (1.35, 1.49)                     | 0.96 (0.92, 0.99)                                                     |
| EMM by race/ethnicity | continuous      | poultry       | 1.42 (1.36, 1.50)                     | 0.96 (0.93, 0.99)                                                     |
| EMM by rurality       | categorical     | hog           | 1.32 (1.27, 1.37)                     | 0.96 (0.91, 0.98)                                                     |
| EMM by rurality       | categorical     | poultry       | 1.33 (1.28, 1.39)                     | 0.96 (0.92, 0.99)                                                     |
| EMM by rurality       | continuous      | hog           | 1.32 (1.27, 1.38)                     | 0.96 (0.92, 0.99)                                                     |
| EMM by rurality       | continuous      | poultry       | 1.33 (1.28, 1.39)                     | 0.96 (0.93, 0.99)                                                     |
| EMM by insurance      | categorical     | hog           | 1.29 (1.24, 1.34)                     | 0.95 (0.89, 0.98)                                                     |
| EMM by insurance      | categorical     | poultry       | 1.29 (1.25, 1.34)                     | 0.95 (0.91, 0.98)                                                     |
| EMM by insurance      | continuous      | hog           | 1.29 (1.24, 1.34)                     | 0.95 (0.90, 0.98)                                                     |

#### S4. Effect Estimates

Estimates of the RR and 95% CI for each joint hog and poultry exposure category on UTI incidence rates, as depicted in Figure 4 of the main text, are presented in Table S4. Likewise, Table S5 presents the RR estimates for each stratum of potential effect measure modifier shown in Figure 3 of the main text, separately for hogs and poultry. Table S6. provides additional detail on the population fraction and crude rates of UTI episodes and ED visits by combined race/ethnicity and hog exposure category.

Table S4. UTI rate ratio estimates for joint categorical exposure to hogs and poultry relative to areas with no exposure to either animal. Low, medium, and high exposure categories correspond to tertiles of non-zero density values. Models were adjusted for ZIP code isolation score, median household income, and percent lacking health insurance.

| Hog density (count/km2) | Poultry density (count/km2) | ZIP codes <sup>a</sup> (observations) | UTI episodes (outcome) | Person-years (offset) | RR (95% CI)       |
|-------------------------|-----------------------------|---------------------------------------|------------------------|-----------------------|-------------------|
| Unexposed (0)           | Unexposed (0)               | 154                                   | 64004                  | 4352470               | (ref)             |
|                         | Low (>0 - 887)              | 78                                    | 87623                  | 4708425               | 0.97 (0.89, 1.05) |
|                         | Medium (887 - 4833)         | 56                                    | 76812                  | 3762531               | 1.06 (0.96, 1.16) |
|                         | High (4833 - 39499)         | 35                                    | 24763                  | 1193332               | 0.99 (0.85, 1.15) |
| Low (>0 - 4)            | Unexposed (0)               | 20                                    | 15808                  | 820874                | 1.33 (1.17, 1.52) |
|                         | Low (>0 - 887)              | 29                                    | 44859                  | 2140262               | 1.06 (0.93, 1.20) |
|                         | Medium (887 - 4833)         | 26                                    | 34240                  | 1635517               | 1.04 (0.91, 1.18) |
|                         | High (4833 - 39499)         | 23                                    | 14907                  | 778670                | 1.06 (0.91, 1.22) |
| Medium (4 - 36)         | Unexposed (0)               | 7                                     | 4013                   | 148164                | 1.44 (1.10, 1.83) |
|                         | Low (>0 - 887)              | 25                                    | 35719                  | 1420455               | 1.19 (1.03, 1.37) |
|                         | Medium (887 - 4833)         | 32                                    | 28025                  | 1168889               | 1.13 (0.98, 1.29) |
|                         | High (4833 - 39499)         | 35                                    | 21593                  | 911275                | 1.09 (0.94, 1.25) |
| High (36 - 1099)        | Unexposed (0)               | 2                                     | 1245                   | 54392                 | 1.51 (1.19, 1.89) |
|                         | Low (>0 - 887)              | 12                                    | 4427                   | 262788                | 1.05 (0.88, 1.24) |
|                         | Medium (887 - 4833)         | 31                                    | 30048                  | 1149803               | 1.28 (1.10, 1.48) |
|                         | High (4833 - 39499)         | 52                                    | 39981                  | 1548996               | 1.25 (1.07, 1.45) |

<sup>a</sup> average number of ZIP codes in each hog/poultry joint exposure category 2016-2019

Table S5. Analysis of effect measure modification of the association between hog or poultry exposure and UTI incidence by calendar year, sex, age group, race/ethnicity, health insurance, and rurality. Modification was assessed on the multiplicative scale in single-animal models using product-term interactions between exposure group and the effect measure modifier and rate ratios as the measure of effect. Low, medium, and high exposure categories correspond to tertiles of non-zero density values, with zero-density ZIP codes as the reference group. Models were adjusted for ZIP code isolation score, median household income, and percent lacking health insurance.

| Group                | Density (count/km <sup>2</sup> ) | Hog                    |              |              |                   | Poultry                |              |              |                   |
|----------------------|----------------------------------|------------------------|--------------|--------------|-------------------|------------------------|--------------|--------------|-------------------|
|                      |                                  | ZIP codes <sup>a</sup> | UTI episodes | Person-years | RR (95% CI)       | ZIP codes <sup>a</sup> | UTI episodes | Person-years | RR (95% CI)       |
| <i>Main analysis</i> |                                  |                        |              |              |                   |                        |              |              |                   |
| All                  | unexposed                        | 324                    | 253202       | 14016758     | (ref)             | 184                    | 85070        | 5375900      | (ref)             |
|                      | low                              | 99                     | 109814       | 5375323      | 1.09 (0.99, 1.19) | 145                    | 172628       | 8531930      | 0.86 (0.81, 0.91) |
|                      | medium                           | 99                     | 89350        | 3648783      | 1.14 (1.02, 1.27) | 146                    | 169125       | 7716740      | 0.92 (0.86, 0.98) |
|                      | high                             | 98                     | 75701        | 3015979      | 1.21 (1.06, 1.37) | 145                    | 101244       | 4432273      | 0.91 (0.84, 0.98) |
|                      | continuous                       | 620                    | 528067       | 26056843     | 1.08 (1.01, 1.16) | 620                    | 528067       | 26056843     | 0.96 (0.91, 1.00) |
| <i>Year</i>          |                                  |                        |              |              |                   |                        |              |              |                   |
| 2016                 | unexposed                        | 81                     | 64704        | 3452532      | (ref)             | 46                     | 21496        | 1345050      | (ref)             |
|                      | low                              | 25                     | 27484        | 1325006      | 1.06 (0.97, 1.16) | 37                     | 44133        | 2118496      | 0.89 (0.84, 0.94) |
|                      | medium                           | 25                     | 22195        | 904947       | 1.12 (1.00, 1.25) | 36                     | 42691        | 1889938      | 0.97 (0.90, 1.04) |
|                      | high                             | 24                     | 18498        | 752283       | 1.17 (1.02, 1.33) | 35                     | 24561        | 1081284      | 0.93 (0.85, 1.01) |
|                      | continuous                       | 155                    | 132881       | 6434768      | 1.06 (0.98, 1.14) | 155                    | 132881       | 6434768      | 0.96 (0.91, 1.01) |
| 2017                 | unexposed                        | 81                     | 65271        | 3485235      | (ref)             | 46                     | 22797        | 1362961      | (ref)             |
|                      | low                              | 25                     | 27861        | 1335261      | 1.07 (0.97, 1.17) | 37                     | 44271        | 2128046      | 0.85 (0.80, 0.90) |
|                      | medium                           | 25                     | 22632        | 908928       | 1.14 (1.01, 1.27) | 36                     | 42010        | 1891114      | 0.91 (0.85, 0.98) |
|                      | high                             | 24                     | 19195        | 756000       | 1.20 (1.06, 1.37) | 36                     | 25881        | 1103303      | 0.92 (0.84, 1.00) |
|                      | continuous                       | 155                    | 134959       | 6485424      | 1.09 (1.01, 1.17) | 155                    | 134959       | 6485424      | 0.97 (0.92, 1.02) |
| 2018                 | unexposed                        | 81                     | 63129        | 3521530      | (ref)             | 46                     | 20497        | 1327010      | (ref)             |
|                      | low                              | 25                     | 27554        | 1351872      | 1.09 (0.99, 1.20) | 36                     | 42296        | 2132255      | 0.89 (0.83, 0.94) |
|                      | medium                           | 25                     | 22048        | 912642       | 1.15 (1.03, 1.28) | 37                     | 43625        | 1967395      | 0.98 (0.91, 1.05) |
|                      | high                             | 24                     | 19274        | 754224       | 1.26 (1.11, 1.44) | 37                     | 25587        | 1113608      | 0.97 (0.89, 1.06) |
|                      | continuous                       | 155                    | 132005       | 6540268      | 1.11 (1.03, 1.19) | 155                    | 132005       | 6540268      | 0.98 (0.94, 1.03) |
| 2019                 | unexposed                        | 81                     | 60098        | 3557461      | (ref)             | 46                     | 20280        | 1340879      | (ref)             |
|                      | low                              | 25                     | 26915        | 1363184      | 1.13 (1.02, 1.23) | 36                     | 41928        | 2153133      | 0.89 (0.84, 0.94) |
|                      | medium                           | 25                     | 22475        | 922266       | 1.23 (1.10, 1.37) | 36                     | 40799        | 1968293      | 0.94 (0.87, 1.00) |

| Group              | Density (count/km <sup>2</sup> ) | Hog                    |              |              |                   | Poultry                |              |              |                   |
|--------------------|----------------------------------|------------------------|--------------|--------------|-------------------|------------------------|--------------|--------------|-------------------|
|                    |                                  | ZIP codes <sup>a</sup> | UTI episodes | Person-years | RR (95% CI)       | ZIP codes <sup>a</sup> | UTI episodes | Person-years | RR (95% CI)       |
|                    | high                             | 24                     | 18734        | 753472       | 1.30 (1.14, 1.49) | 38                     | 25215        | 1134078      | 0.96 (0.88, 1.04) |
|                    | continuous                       | 155                    | 128222       | 6596383      | 1.13 (1.05, 1.22) | 155                    | 128222       | 6596383      | 0.98 (0.93, 1.02) |
| <i>Sex</i>         |                                  |                        |              |              |                   |                        |              |              |                   |
| Female             | unexposed                        | 324                    | 206825       | 7149281      | (ref)             | 184                    | 68574        | 2736889      | (ref)             |
|                    | low                              | 99                     | 89605        | 2760892      | 1.07 (0.98, 1.17) | 145                    | 140745       | 4397540      | 0.87 (0.83, 0.92) |
|                    | medium                           | 99                     | 73001        | 1866981      | 1.13 (1.02, 1.25) | 146                    | 139124       | 3920252      | 0.95 (0.89, 1.02) |
|                    | high                             | 98                     | 61645        | 1519919      | 1.19 (1.05, 1.34) | 145                    | 82633        | 2242392      | 0.94 (0.86, 1.01) |
|                    | continuous                       | 620                    | 431076       | 13297073     | 1.08 (1.01, 1.16) | 620                    | 431076       | 13297073     | 0.97 (0.93, 1.02) |
| Male               | unexposed                        | 324                    | 46265        | 6867487      | (ref)             | 184                    | 16399        | 2639020      | (ref)             |
|                    | low                              | 99                     | 19956        | 2614441      | 1.08 (0.99, 1.18) | 145                    | 31398        | 4134385      | 0.83 (0.79, 0.88) |
|                    | medium                           | 99                     | 15899        | 1781804      | 1.11 (1.00, 1.23) | 146                    | 29690        | 3796482      | 0.85 (0.79, 0.90) |
|                    | high                             | 98                     | 13799        | 1496054      | 1.17 (1.03, 1.32) | 145                    | 18432        | 2189899      | 0.85 (0.79, 0.93) |
|                    | continuous                       | 620                    | 95919        | 12759786     | 1.07 (1.00, 1.15) | 620                    | 95919        | 12759786     | 0.92 (0.88, 0.96) |
| <i>Age (years)</i> |                                  |                        |              |              |                   |                        |              |              |                   |
| 0 - 4              | unexposed                        | 324                    | 5308         | 768645       | (ref)             | 184                    | 1505         | 287175       | (ref)             |
|                    | low                              | 99                     | 2497         | 318964       | 1.13 (1.02, 1.24) | 145                    | 3904         | 505352       | 0.90 (0.83, 0.97) |
|                    | medium                           | 99                     | 2026         | 234775       | 1.06 (0.94, 1.18) | 146                    | 3682         | 461126       | 0.94 (0.86, 1.03) |
|                    | high                             | 98                     | 1576         | 189530       | 1.07 (0.94, 1.22) | 145                    | 2316         | 258261       | 0.98 (0.89, 1.09) |
|                    | continuous                       | 620                    | 11407        | 1511914      | 1.03 (0.96, 1.11) | 620                    | 11407        | 1511914      | 0.97 (0.92, 1.03) |
| 5 - 17             | unexposed                        | 324                    | 13973        | 2349661      | (ref)             | 184                    | 4379         | 809221       | (ref)             |
|                    | low                              | 99                     | 6745         | 908291       | 1.21 (1.11, 1.33) | 145                    | 10253        | 1497772      | 0.80 (0.75, 0.86) |
|                    | medium                           | 99                     | 5467         | 649816       | 1.19 (1.07, 1.32) | 146                    | 9789         | 1349055      | 0.85 (0.79, 0.92) |
|                    | high                             | 98                     | 4258         | 516359       | 1.19 (1.05, 1.35) | 145                    | 6022         | 768079       | 0.86 (0.78, 0.94) |
|                    | continuous                       | 620                    | 30443        | 4424127      | 1.07 (1.00, 1.16) | 620                    | 30443        | 4424127      | 0.94 (0.89, 0.99) |
| 18 - 34            | unexposed                        | 324                    | 61942        | 2733291      | (ref)             | 184                    | 18586        | 1081350      | (ref)             |
|                    | low                              | 99                     | 27872        | 1082246      | 1.10 (1.01, 1.20) | 145                    | 45678        | 1696866      | 0.93 (0.87, 0.98) |
|                    | medium                           | 99                     | 25370        | 781916       | 1.19 (1.08, 1.32) | 146                    | 46056        | 1580922      | 1.01 (0.94, 1.08) |
|                    | high                             | 98                     | 20434        | 677180       | 1.20 (1.06, 1.35) | 145                    | 25298        | 915495       | 0.90 (0.83, 0.98) |
|                    | continuous                       | 620                    | 135618       | 5274633      | 1.09 (1.02, 1.17) | 620                    | 135618       | 5274633      | 0.96 (0.92, 1.01) |

| Group                                      | Density (count/km <sup>2</sup> ) | Hog                    |              |              |                   | Poultry                |              |              |                   |
|--------------------------------------------|----------------------------------|------------------------|--------------|--------------|-------------------|------------------------|--------------|--------------|-------------------|
|                                            |                                  | ZIP codes <sup>a</sup> | UTI episodes | Person-years | RR (95% CI)       | ZIP codes <sup>a</sup> | UTI episodes | Person-years | RR (95% CI)       |
| 35 - 64                                    | unexposed                        | 324                    | 74093        | 5704441      | (ref)             | 184                    | 23556        | 2120386      | (ref)             |
|                                            | low                              | 99                     | 32379        | 2135191      | 1.12 (1.03, 1.22) | 145                    | 51677        | 3451280      | 0.86 (0.81, 0.91) |
|                                            | medium                           | 99                     | 28015        | 1435027      | 1.27 (1.14, 1.40) | 146                    | 51762        | 3096246      | 0.94 (0.88, 1.00) |
|                                            | high                             | 98                     | 23382        | 1148902      | 1.34 (1.18, 1.51) | 145                    | 30874        | 1755649      | 0.93 (0.86, 1.01) |
|                                            | continuous                       | 620                    | 157869       | 10423561     | 1.15 (1.07, 1.23) | 620                    | 157869       | 10423561     | 0.98 (0.93, 1.03) |
| 65+                                        | unexposed                        | 324                    | 97886        | 2460725      | (ref)             | 184                    | 37044        | 1077774      | (ref)             |
|                                            | low                              | 99                     | 40317        | 930641       | 1.03 (0.94, 1.13) | 145                    | 61115        | 1380658      | 0.81 (0.76, 0.86) |
|                                            | medium                           | 99                     | 28471        | 547250       | 1.07 (0.96, 1.18) | 146                    | 57832        | 1229401      | 0.82 (0.77, 0.88) |
|                                            | high                             | 98                     | 26050        | 483996       | 1.14 (1.01, 1.29) | 145                    | 36733        | 734779       | 0.86 (0.79, 0.93) |
|                                            | continuous                       | 620                    | 192724       | 4422612      | 1.05 (0.98, 1.13) | 620                    | 192724       | 4422612      | 0.92 (0.88, 0.97) |
| <i>Combined race/ethnicity<sup>b</sup></i> |                                  |                        |              |              |                   |                        |              |              |                   |
| American Indian                            | unexposed                        | 247                    | 2272         | 114897       | (ref)             | 132                    | 466          | 54713        | (ref)             |
|                                            | low                              | 84                     | 1323         | 69490        | 1.04 (0.92, 1.18) | 126                    | 938          | 49003        | 1.35 (1.18, 1.53) |
|                                            | medium                           | 80                     | 3504         | 99871        | 1.68 (1.47, 1.91) | 123                    | 3483         | 116708       | 1.73 (1.53, 1.95) |
|                                            | high                             | 84                     | 3299         | 112103       | 1.45 (1.24, 1.69) | 115                    | 5511         | 175937       | 1.53 (1.34, 1.75) |
|                                            | continuous                       | 496                    | 10398        | 396361       | 1.17 (1.08, 1.27) | 496                    | 10398        | 396361       | 1.06 (0.99, 1.13) |
| Asian                                      | unexposed                        | 252                    | 853          | 225466       | (ref)             | 131                    | 266          | 77392        | (ref)             |
|                                            | low                              | 86                     | 412          | 67874        | 1.45 (1.24, 1.69) | 122                    | 384          | 106634       | 0.81 (0.69, 0.96) |
|                                            | medium                           | 80                     | 384          | 30091        | 2.93 (2.47, 3.45) | 123                    | 822          | 121197       | 1.65 (1.41, 1.92) |
|                                            | high                             | 69                     | 260          | 20150        | 2.78 (2.27, 3.36) | 112                    | 437          | 38358        | 2.26 (1.89, 2.69) |
|                                            | continuous                       | 487                    | 1909         | 343581       | 1.83 (1.65, 2.03) | 487                    | 1909         | 343581       | 1.56 (1.43, 1.69) |
| Black                                      | unexposed                        | 301                    | 35004        | 1562175      | (ref)             | 166                    | 9686         | 516142       | (ref)             |
|                                            | low                              | 99                     | 30151        | 1093138      | 1.21 (1.09, 1.33) | 144                    | 49955        | 1842746      | 1.00 (0.94, 1.06) |
|                                            | medium                           | 99                     | 31854        | 1095552      | 1.13 (1.00, 1.27) | 144                    | 40985        | 1434587      | 1.14 (1.06, 1.22) |
|                                            | high                             | 98                     | 26353        | 812592       | 1.35 (1.17, 1.55) | 143                    | 22736        | 769982       | 1.11 (1.02, 1.22) |
|                                            | continuous                       | 597                    | 123362       | 4563457      | 1.14 (1.05, 1.23) | 597                    | 123362       | 4563457      | 1.00 (0.95, 1.05) |
| Hispanic                                   | unexposed                        | 310                    | 8992         | 1044896      | (ref)             | 172                    | 4250         | 359609       | (ref)             |
|                                            | low                              | 96                     | 4975         | 458977       | 1.26 (1.14, 1.40) | 143                    | 8112         | 686884       | 0.68 (0.63, 0.72) |
|                                            | medium                           | 97                     | 6020         | 339370       | 1.92 (1.69, 2.15) | 142                    | 6128         | 638846       | 0.61 (0.56, 0.66) |

| Group                               | Density (count/km <sup>2</sup> ) | Hog                    |              |              |                   | Poultry                |              |              |                   |
|-------------------------------------|----------------------------------|------------------------|--------------|--------------|-------------------|------------------------|--------------|--------------|-------------------|
|                                     |                                  | ZIP codes <sup>a</sup> | UTI episodes | Person-years | RR (95% CI)       | ZIP codes <sup>a</sup> | UTI episodes | Person-years | RR (95% CI)       |
|                                     | high                             | 98                     | 2660         | 329014       | 0.85 (0.74, 0.98) | 144                    | 4157         | 486918       | 0.49 (0.45, 0.54) |
|                                     | continuous                       | 602                    | 22647        | 2172257      | 0.97 (0.89, 1.05) | 602                    | 22647        | 2172257      | 0.74 (0.70, 0.78) |
| White                               | unexposed                        | 324                    | 186609       | 10792819     | (ref)             | 184                    | 66719        | 4253990      | (ref)             |
|                                     | low                              | 99                     | 68346        | 3561738      | 1.06 (0.96, 1.16) | 145                    | 102757       | 5654218      | 0.82 (0.77, 0.87) |
|                                     | medium                           | 99                     | 42661        | 1994490      | 1.15 (1.02, 1.29) | 146                    | 105597       | 5230198      | 0.94 (0.88, 1.01) |
|                                     | high                             | 98                     | 38789        | 1667482      | 1.21 (1.05, 1.38) | 145                    | 61332        | 2878123      | 0.96 (0.88, 1.05) |
|                                     | continuous                       | 620                    | 336405       | 18016529     | 1.10 (1.02, 1.19) | 620                    | 336405       | 18016529     | 0.99 (0.94, 1.04) |
| Other                               | unexposed                        | 300                    | 3364         | 276612       | (ref)             | 166                    | 1137         | 114138       | (ref)             |
|                                     | low                              | 98                     | 1927         | 124144       | 1.25 (1.12, 1.40) | 142                    | 2622         | 192497       | 0.94 (0.86, 1.03) |
|                                     | medium                           | 98                     | 2348         | 89492        | 1.91 (1.67, 2.16) | 142                    | 4344         | 175264       | 1.81 (1.65, 1.99) |
|                                     | high                             | 96                     | 2172         | 74701        | 2.14 (1.84, 2.48) | 142                    | 1708         | 83050        | 1.32 (1.18, 1.48) |
|                                     | continuous                       | 592                    | 9811         | 564949       | 1.48 (1.36, 1.61) | 592                    | 9811         | 564949       | 1.16 (1.10, 1.23) |
| <i>Health insurance<sup>c</sup></i> |                                  |                        |              |              |                   |                        |              |              |                   |
| Private                             | unexposed                        | 324                    | 45901        | 9228813      | (ref)             | 184                    | 14490        | 3556669      | (ref)             |
|                                     | low                              | 99                     | 22461        | 3414107      | 1.23 (1.12, 1.34) | 145                    | 34237        | 5513378      | 1.17 (1.11, 1.24) |
|                                     | medium                           | 99                     | 17014        | 2156852      | 1.36 (1.22, 1.51) | 146                    | 30051        | 4788860      | 1.17 (1.09, 1.25) |
|                                     | high                             | 98                     | 12945        | 1627423      | 1.39 (1.22, 1.58) | 145                    | 19543        | 2568288      | 1.27 (1.17, 1.38) |
|                                     | continuous                       | 620                    | 98321        | 16427195     | 1.23 (1.15, 1.31) | 620                    | 98321        | 16427195     | 1.10 (1.05, 1.15) |
| Public                              | unexposed                        | 324                    | 142254       | 2995284      | (ref)             | 184                    | 52087        | 1075955      | (ref)             |
|                                     | low                              | 99                     | 62790        | 1238546      | 0.99 (0.91, 1.08) | 145                    | 95876        | 1938936      | 0.76 (0.72, 0.80) |
|                                     | medium                           | 99                     | 52980        | 943208       | 0.99 (0.89, 1.10) | 146                    | 98939        | 1839810      | 0.79 (0.74, 0.84) |
|                                     | high                             | 98                     | 46688        | 850936       | 1.04 (0.92, 1.18) | 145                    | 57810        | 1173273      | 0.69 (0.63, 0.75) |
|                                     | continuous                       | 620                    | 304712       | 6027974      | 1.00 (0.94, 1.07) | 620                    | 304712       | 6027974      | 0.88 (0.84, 0.93) |
| Uninsured                           | unexposed                        | 324                    | 37241        | 1551081      | (ref)             | 184                    | 11428        | 600228       | (ref)             |
|                                     | low                              | 99                     | 15509        | 612755       | 0.98 (0.90, 1.07) | 145                    | 26579        | 941158       | 1.11 (1.05, 1.18) |
|                                     | medium                           | 99                     | 14887        | 465807       | 1.13 (1.01, 1.25) | 146                    | 27118        | 898213       | 1.16 (1.08, 1.24) |
|                                     | high                             | 98                     | 12457        | 417213       | 1.13 (0.99, 1.28) | 145                    | 14969        | 607257       | 0.90 (0.82, 0.98) |
|                                     | continuous                       | 620                    | 80094        | 3046856      | 1.06 (0.99, 1.13) | 620                    | 80094        | 3046856      | 0.96 (0.92, 1.01) |

| Group                       | Density (count/km <sup>2</sup> ) | Hog                    |              |              |                   | Poultry                |              |              |                   |
|-----------------------------|----------------------------------|------------------------|--------------|--------------|-------------------|------------------------|--------------|--------------|-------------------|
|                             |                                  | ZIP codes <sup>a</sup> | UTI episodes | Person-years | RR (95% CI)       | ZIP codes <sup>a</sup> | UTI episodes | Person-years | RR (95% CI)       |
| <i>Rurality<sup>d</sup></i> |                                  |                        |              |              |                   |                        |              |              |                   |
| Suburban                    | unexposed                        | 157                    | 200062       | 11027225     | (ref)             | 74                     | 59513        | 3826742      | (ref)             |
|                             | low                              | 46                     | 82894        | 4177019      | 1.12 (0.99, 1.25) | 81                     | 145349       | 7149221      | 0.85 (0.81, 0.91) |
|                             | medium                           | 32                     | 58782        | 2278579      | 1.20 (1.03, 1.38) | 76                     | 132524       | 6169754      | 0.92 (0.86, 0.99) |
|                             | high                             | 20                     | 27828        | 1185489      | 1.24 (1.04, 1.46) | 24                     | 32180        | 1522595      | 0.90 (0.80, 1.02) |
|                             | continuous                       | 255                    | 369566       | 18668312     | 1.10 (0.99, 1.21) | 255                    | 369566       | 18668312     | 0.90 (0.85, 0.96) |
| Small town                  | unexposed                        | 82                     | 39877        | 2209728      | (ref)             | 45                     | 18094        | 1094883      | (ref)             |
|                             | low                              | 32                     | 22001        | 975255       | 1.10 (0.96, 1.26) | 26                     | 15831        | 809704       | 0.89 (0.77, 1.03) |
|                             | medium                           | 32                     | 20714        | 957370       | 1.12 (0.97, 1.29) | 35                     | 28193        | 1190447      | 0.93 (0.81, 1.07) |
|                             | high                             | 36                     | 31863        | 1213374      | 1.24 (1.05, 1.44) | 75                     | 52337        | 2260693      | 0.93 (0.80, 1.07) |
|                             | continuous                       | 182                    | 114455       | 5355727      | 1.08 (0.99, 1.17) | 182                    | 114455       | 5355727      | 1.01 (0.94, 1.08) |
| Rural                       | unexposed                        | 85                     | 13263        | 779805       | (ref)             | 65                     | 7463         | 454275       | (ref)             |
|                             | low                              | 21                     | 4919         | 223049       | 0.98 (0.82, 1.18) | 38                     | 11448        | 573005       | 0.90 (0.77, 1.05) |
|                             | medium                           | 35                     | 9854         | 412834       | 1.08 (0.92, 1.27) | 34                     | 8408         | 356539       | 0.96 (0.82, 1.13) |
|                             | high                             | 42                     | 16010        | 617116       | 1.14 (0.95, 1.35) | 46                     | 16727        | 648985       | 0.92 (0.78, 1.08) |
|                             | continuous                       | 183                    | 44046        | 2032804      | 1.07 (0.98, 1.17) | 183                    | 44046        | 2032804      | 1.00 (0.93, 1.08) |

<sup>a</sup> Average number of ZIP codes in each exposure category by group in 2016-2019

<sup>b</sup> Individuals of any race reporting Hispanic ethnicity were included in a combined Hispanic race/ethnicity group; all other race/ethnicity groups contained only individuals of non-Hispanic ethnicity, with the Other race group comprising individuals of two or more races and Pacific Islanders

<sup>c</sup> Health insurance EMM models were not adjusted for percent of ZIP code population lacking health insurance

<sup>d</sup> Rurality EMM models were not adjusted for ZIP code isolation score



Table S6. Population and incidence of UTI episodes and total ED visits by hog exposure category and combined race/ethnicity in 2019.

|                                             | <b>Hog exposure category</b> |               |               |              |               |
|---------------------------------------------|------------------------------|---------------|---------------|--------------|---------------|
|                                             | <b>unexposed</b>             | <b>low</b>    | <b>medium</b> | <b>high</b>  | <b>all</b>    |
| Hog density (count/km <sup>2</sup> ), range | 0                            | >0 - 7        | 7 - 56        | 56 - 1436    | 0 - 1436      |
| Total population                            |                              |               |               |              |               |
| UTI episodes, N (rate per 1000)             | 120196 (17)                  | 53435 (20)    | 45746 (24)    | 37067 (26)   | 256444 (19)   |
| Total ED visits, N (rate per 1000)          | 3308856 (465)                | 1447224 (528) | 1151499 (610) | 902923 (622) | 6810502 (516) |
| Population, N                               | 3557461                      | 1363184       | 922266        | 753472       | 6596383       |
| <b>American Indian</b>                      |                              |               |               |              |               |
| UTI episodes, N (rate per 1000)             | 519 (18)                     | 332 (18)      | 866 (35)      | 879 (31)     | 2596 (26)     |
| Total ED visits, N (rate per 1000)          | 11237 (385)                  | 7768 (425)    | 18869 (761)   | 18290 (647)  | 56164 (559)   |
| Population, N (%)                           | 29155 (1)                    | 18287 (1)     | 24785 (3)     | 28267 (4)    | 100494 (2)    |
| <b>Asian</b>                                |                              |               |               |              |               |
| UTI episodes, N (rate per 1000)             | 213 (4)                      | 82 (5)        | 39 (5)        | 35 (7)       | 369 (4)       |
| Total ED visits, N (rate per 1000)          | 6512 (107)                   | 2483 (140)    | 1035 (138)    | 756 (146)    | 10786 (118)   |
| Population, N (%)                           | 60670 (2)                    | 17765 (1)     | 7498 (1)      | 5185 (1)     | 91118 (1)     |
| <b>Black</b>                                |                              |               |               |              |               |
| UTI episodes, N (rate per 1000)             | 9250 (23)                    | 7758 (28)     | 8955 (33)     | 6856 (34)    | 32819 (28)    |
| Total ED visits, N (rate per 1000)          | 290616 (723)                 | 230869 (840)  | 237902 (863)  | 180571 (899) | 939958 (815)  |
| Population, N (%)                           | 401753 (11)                  | 274689 (20)   | 275521 (30)   | 200948 (27)  | 1152911 (17)  |
| <b>White</b>                                |                              |               |               |              |               |
| UTI episodes, N (rate per 1000)             | 45170 (17)                   | 16806 (19)    | 10501 (21)    | 9542 (23)    | 82019 (18)    |
| Total ED visits, N (rate per 1000)          | 1187293 (437)                | 418328 (464)  | 246964 (491)  | 219967 (531) | 2072552 (457) |
| Population, N (%)                           | 2717300 (76)                 | 902123 (66)   | 503311 (55)   | 413861 (55)  | 4536595 (69)  |
| <b>Hispanic</b>                             |                              |               |               |              |               |
| UTI episodes, N (rate per 1000)             | 2393 (9)                     | 1296 (11)     | 1394 (16)     | 662 (8)      | 5745 (10)     |
| Total ED visits, N (rate per 1000)          | 79804 (290)                  | 43586 (373)   | 39898 (454)   | 25448 (298)  | 188736 (334)  |
| Population, N (%)                           | 274755 (8)                   | 116954 (9)    | 87815 (10)    | 85528 (11)   | 565052 (9)    |
| <b>Other race</b>                           |                              |               |               |              |               |
| UTI episodes, N (rate per 1000)             | 1018 (14)                    | 505 (15)      | 542 (23)      | 443 (22)     | 2508 (17)     |
| Total ED visits, N (rate per 1000)          | 36787 (498)                  | 17913 (537)   | 14841 (635)   | 12858 (653)  | 82399 (548)   |
| Population, N (%)                           | 73839 (2)                    | 33372 (2)     | 23354 (3)     | 19699 (3)    | 150264 (2)    |

## S5. Stan Model Code

```
1. // bym2: adapted from Morris et al. 2019
2. // adapted BRMS code to accommodate multiple observations per zip code
3.
4. functions {
5.   real icar_normal_lpdf(vector phi, int N_locs, int[] node1, int[] node2) {
6.     return -0.5 * dot_self(phi[node1] - phi[node2])
7.       + normal_lpdf(sum(phi) | 0, 0.001 * N_locs); // soft sum-to-zero constraint
8.   }
9. }
10.
11. data {
12.   int<lower = 0> N_obs;           // number of observations
13.   int<lower = 0> loc[N_obs] ;    // location ID
14.   int<lower = 0> y[N_obs];       // count outcomes
15.   vector<lower = 0>[N_obs] E;    // exposure (offset)
16.   int<lower = 1> K;              // num covariates
17.   matrix[N_obs, K] x;           // design matrix
18.   int<lower = 0, upper = 1> binary[K]; // indicator if predictor is binary (do not std)
19.
20.   int<lower = 0> N_locs; // number of locations
21.   int<lower = 0> N_edges; // number of connections between locations
22.   int<lower = 1, upper = N_locs> node1[N_edges]; // node1[i], node2[i] neighbors
23.   int<lower = 1, upper = N_locs> node2[N_edges]; // node1[i] < node2[i]
24.
25.   real<lower = 0> scaling_factor; // scales the variance of the spatial effects
26. }
27.
28. transformed data {
29.   vector[N_obs] log_E = log(E); // log offset
30.
31.   // standardize
32.   vector[K] x_mean;
33.   vector[K] x_sd;
34.   matrix[N_obs, K] x_std;
35.
36.   for (k in 1:K) {
37.     if (binary[k] == 0) {
38.       x_mean[k] = mean(x[,k]);
39.       x_sd[k] = sd(x[,k]);
40.       x_std[,k] = (x[,k] - x_mean[k]) / x_sd[k];
41.     } else {
42.       x_mean[k] = 0;
43.       x_sd[k] = 1;
44.       x_std[,k] = x[,k];
45.     }
46.   }
47. }
48.
49. parameters {
50.   vector[K] betas_std;           // standardized covariates
51.   real logit_rho;               // log-odds of proportion spatial random effect
52.
53.   vector[N_locs] phi;           // spatial effects
54.   vector[N_locs] theta;         // heterogeneous effects
55.   real<lower = 0> sigma;         // overall standard deviation
56. }
57.
58. transformed parameters {
59.   real<lower = 0, upper = 1> rho = inv_logit(logit_rho); // proportion spatial RE
60. }
```

```

61. // combine spatial and non-spatial random effects for each location
62. vector[N_locs] convolved_re = sqrt(rho / scaling_factor) * phi
63.     + sqrt(1 - rho) * theta;
64. }
65.
66. model {
67.   y ~ poisson_log(log_E + x_std * betas_std + convolved_re[loc] * sigma);
68.
69.   betas_std[1] ~ normal(0, 2.5);
70.   betas_std[2:K] ~ normal(0, 1);
71.   logit_rho ~ normal(0, 1);
72.   sigma ~ normal(0, 1);
73.   theta ~ normal(0, 1);
74.   phi ~ icar_normal(N_locs, node1, node2);
75. }
76.
77. generated quantities{
78.   vector[K] betas;
79.   vector[K] RRs;
80.
81.   // posterior
82.   vector[N_obs] eta = log_E + x_std * betas_std + convolved_re[loc] * sigma;
83.   vector[N_obs] mu = exp(eta);
84.
85.   int y_rep[N_obs]; // posterior predictions
86.   if (max(eta) > 20) {
87.     // avoid overflow in poisson_log_rng
88.     print("max eta too big: ", max(eta));
89.     for (n in 1:N_obs)
90.       y_rep[n] = -1;
91.   } else {
92.     for (n in 1:N_obs)
93.       y_rep[n] = poisson_log_rng(eta[n]);
94.   }
95.
96.   // unstandardized coefficients
97.   for(k in 1:K){
98.     betas[k] = betas_std[k] / x_sd[k];
99.   }
100.
101.   RRs = exp(betas);
102. }
103.

```

## S6. Supplementary References

- Anker, J.C.H., Koch, A., Ethelberg, S., Mølbak, K., Larsen, J., Jepsen, M.R., 2018. Distance to pig farms as risk factor for community-onset livestock-associated MRSA CC398 infection in persons without known contact to pig farms-A nationwide study. *Zoonoses Public Health* 65, 352–360. <https://doi.org/10.1111/zph.12441>
- Best, N.G., Ickstadt, K., Wolpert, R.L., 2000. Spatial Poisson Regression for Health and Exposure Data Measured at Disparate Resolutions. *Journal of the American Statistical Association* 95, 1076–1088. <https://doi.org/10.1080/01621459.2000.10474304>
- Briant, A., Combes, P.-P., Lafourcade, M., 2010. Dots to boxes: Do the size and shape of spatial units jeopardize economic geography estimations? *Journal of Urban Economics* 67, 287–302. <https://doi.org/10.1016/j.jue.2009.09.014>
- Casey, J.A., Curriero, F.C., Cosgrove, S.E., Nachman, K.E., Schwartz, B.S., 2013. High-Density Livestock Operations, Crop Field Application of Manure, and Risk of Community-Associated Methicillin-Resistant *Staphylococcus aureus* Infection in Pennsylvania. *JAMA Intern Med* 173, 1980. <https://doi.org/10.1001/jamainternmed.2013.10408>
- Casey, J.A., Kim, B.F., Larsen, J., Price, L.B., Nachman, K.E., 2015. Industrial Food Animal Production and Community Health. *Curr Envir Health Rpt* 2, 259–271. <https://doi.org/10.1007/s40572-015-0061-0>
- Christenson, E., Wickersham, L., Jacob, M., Stewart, J., 2022. A watershed study assessing effects of commercial hog operations on microbial water quality in North Carolina, USA. *Science of The Total Environment* 838, 156085. <https://doi.org/10.1016/j.scitotenv.2022.156085>
- de Rooij, M.M.T., Hoek, G., Schmitt, H., Janse, I., Swart, A., Maassen, C.B.M., Schalk, M., Heederik, D.J.J., Wouters, I.M., 2019. Insights into Livestock-Related Microbial Concentrations in Air at

Residential Level in a Livestock Dense Area. *Environ. Sci. Technol.* 53, 7746–7758.

<https://doi.org/10.1021/acs.est.8b07029>

Fleischer, N.L., Roux, A.V.D., 2008. Using directed acyclic graphs to guide analyses of neighbourhood health effects: an introduction. *Journal of Epidemiology & Community Health* 62, 842–846.

<https://doi.org/10.1136/jech.2007.067371>

Foxman, B., 2010. The epidemiology of urinary tract infection. *Nature Reviews Urology* 7, 653–660.

<https://doi.org/10.1038/nrurol.2010.190>

Kravchenko, J., Rhew, S.H., Akushevich, I., Agarwal, P., Lyerly, H.K., 2018. Mortality and Health Outcomes in North Carolina Communities Located in Close Proximity to Hog Concentrated Animal Feeding Operations. *North Carolina Medical Journal* 79, 278–288.

<https://doi.org/10.18043/ncm.79.5.278>

Parenteau, M.-P., Sawada, M.C., 2011. The modifiable areal unit problem (MAUP) in the relationship between exposure to NO<sub>2</sub> and respiratory health. *Int J Health Geogr* 10, 58.

<https://doi.org/10.1186/1476-072x-10-58>

Quist, A.J.L., Holcomb, D.A., Fliss, M.D., Delamater, P.L., Richardson, D.B., Engel, L.S., 2022. Exposure to industrial hog operations and gastrointestinal illness in North Carolina, USA.

*Science of The Total Environment* 830, 154823. <https://doi.org/10.1016/j.scitotenv.2022.154823>

Son, J.-Y., Miranda, M.L., Bell, M.L., 2021a. Exposure to concentrated animal feeding operations (CAFOs) and risk of mortality in North Carolina, USA. *Science of The Total Environment* 799,

149407. <https://doi.org/10.1016/j.scitotenv.2021.149407>

Son, J.-Y., Muenich, R.L., Schaffer-Smith, D., Miranda, M.L., Bell, M.L., 2021b. Distribution of environmental justice metrics for exposure to CAFOs in North Carolina, USA. *Environmental*

*Research* 195, 110862. <https://doi.org/10.1016/j.envres.2021.110862>

- Tennant, P.W.G., Murray, E.J., Arnold, K.F., Berrie, L., Fox, M.P., Gadd, S.C., Harrison, W.J., Keeble, C., Ranker, L.R., Textor, J., Tomova, G.D., Gilthorpe, M.S., Ellison, G.T.H., 2020. Use of directed acyclic graphs (DAGs) to identify confounders in applied health research: review and recommendations. *International Journal of Epidemiology* 50, 620–632.  
<https://doi.org/10.1093/ije/dyaa213>
- Textor, J., van der Zander, B., Gilthorpe, M.S., Liškiewicz, M., Ellison, G.T.H., 2017. Robust causal inference using directed acyclic graphs: the R package ‘dagitty.’ *Int. J. Epidemiol.* dyw341.  
<https://doi.org/10.1093/ije/dyw341>
- Wiesner-Friedman, C., Beattie, R.E., Stewart, J.R., Hristova, K.R., Serre, M.L., 2022. Characterizing Differences in Sources of and Contributions to Fecal Contamination of Sediment and Surface Water with the Microbial FIT Framework. *Environ. Sci. Technol.*  
<https://doi.org/10.1021/acs.est.2c00224>
- Williams, D.L., Breyse, P.N., McCormack, M.C., Diette, G.B., McKenzie, S., Geyh, A.S., 2011. Airborne cow allergen, ammonia and particulate matter at homes vary with distance to industrial scale dairy operations: an exposure assessment. *Environ Health* 10, 72.  
<https://doi.org/10.1186/1476-069X-10-72>
